# Supplementary material for: Bisphenol A Does Not Mimic Estrogen in the Promotion of the In Vitro Response of Murine Dendritic Cells to Toll-Like Receptor Ligands
Source: Hindawi journal article supplement (doi:10.1155/2017/2034348), 2017-01-01

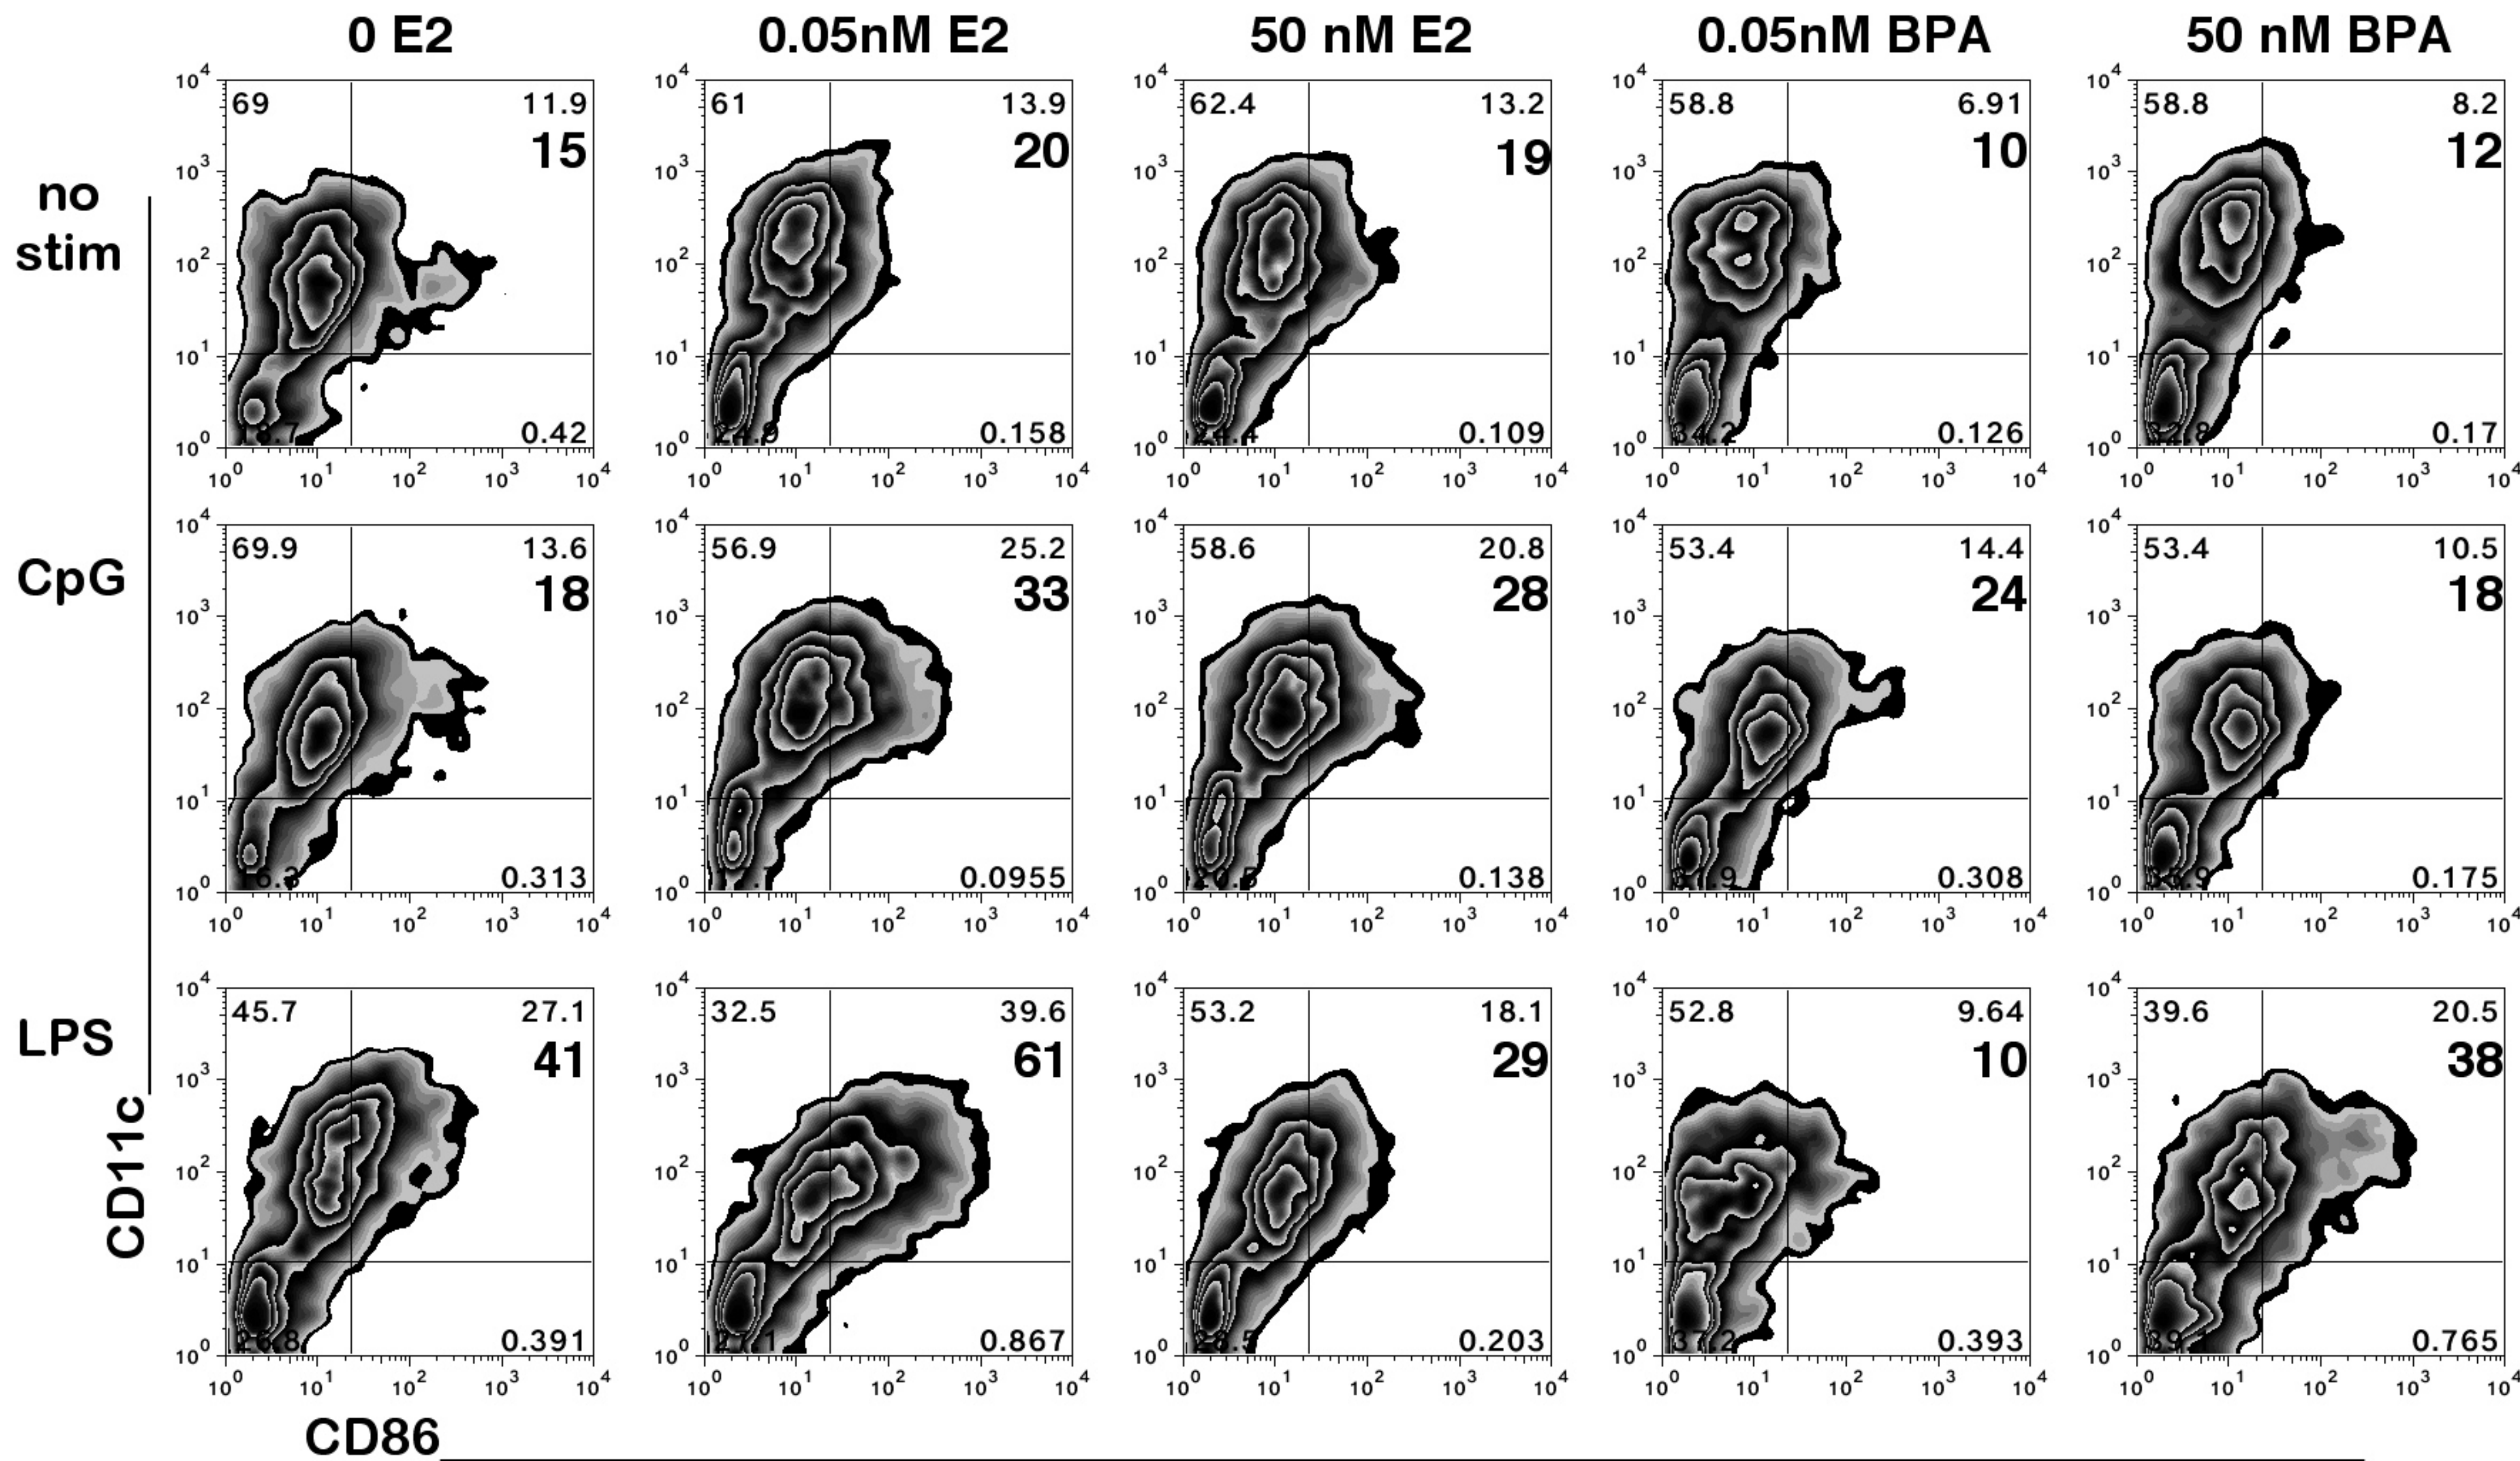

Supplement: f5 [file 2034348.f5.pdf]
